# Supplementary material for: Functional maturation of human iPSC-derived pyramidal neurons in vivo is dependent on proximity with the host tissue
Source: Frontiers journal article supplement (doi:10.3389/fncel.2023.1259712), 2023-11-23
Supplement: Data_Sheet_1.PDF [file Data_Sheet_1.PDF]

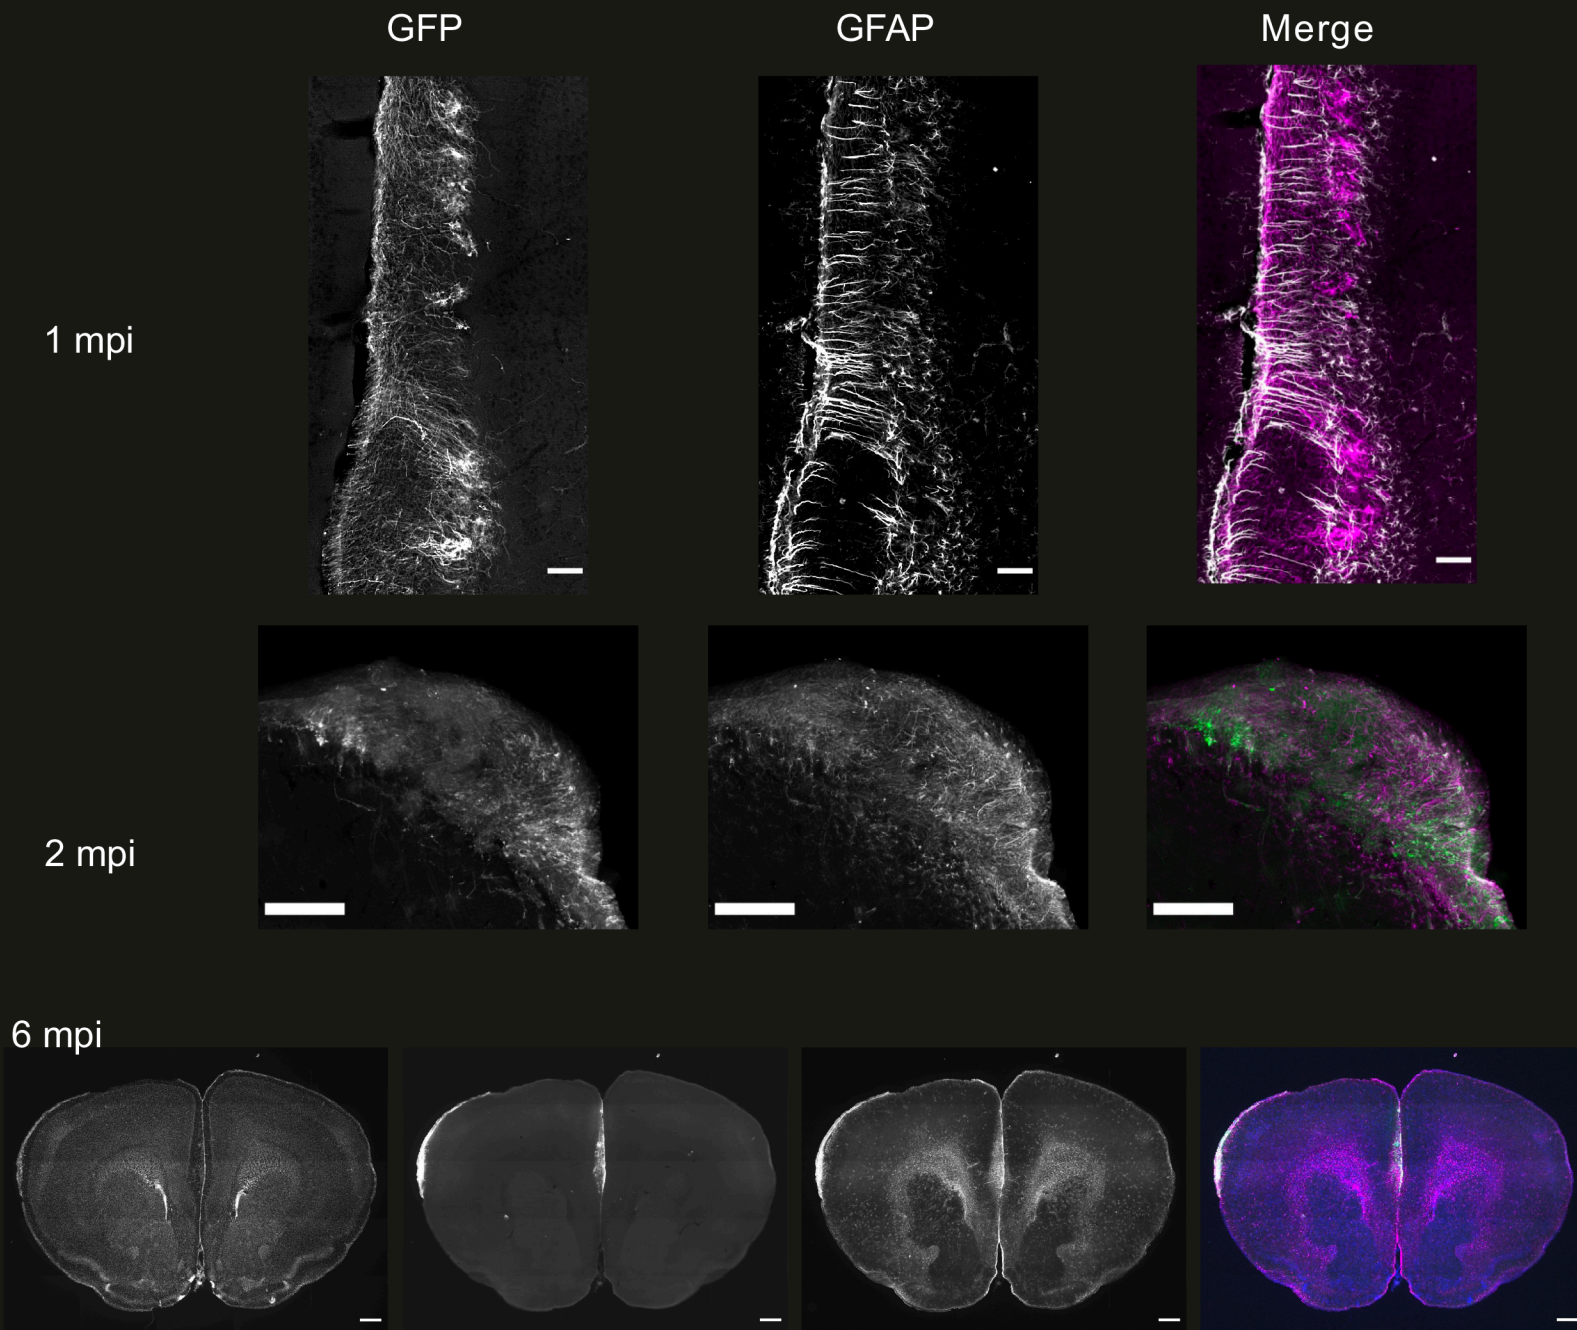

### Supplementary Figure 1

Representative images of mouse brain slices 1 (A), 2 (B) and 6 (C) mpi, labeled by immunofluorescence with antibodies directed against GFP, GFAP and counterstained with DAPI.

Scale bar= 1mpi, 50 $\mu$ m; 2mpi, 200 $\mu$ m; 6mpi, 500 $\mu$ m.
