# Supplementary material for: Functional maturation of human iPSC-derived pyramidal neurons in vivo is dependent on proximity with the host tissue
Source: Frontiers journal article supplement (doi:10.3389/fncel.2023.1259712), 2023-11-23
Supplement: Data_Sheet_2.PDF [file Data_Sheet_2.PDF]

**A**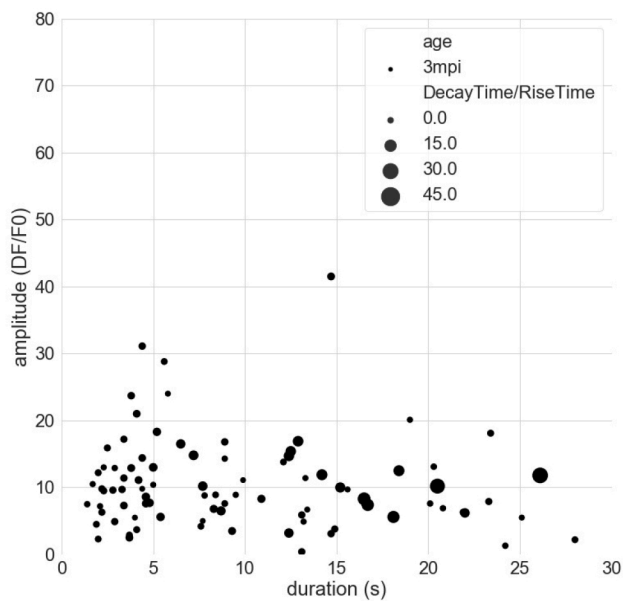**B**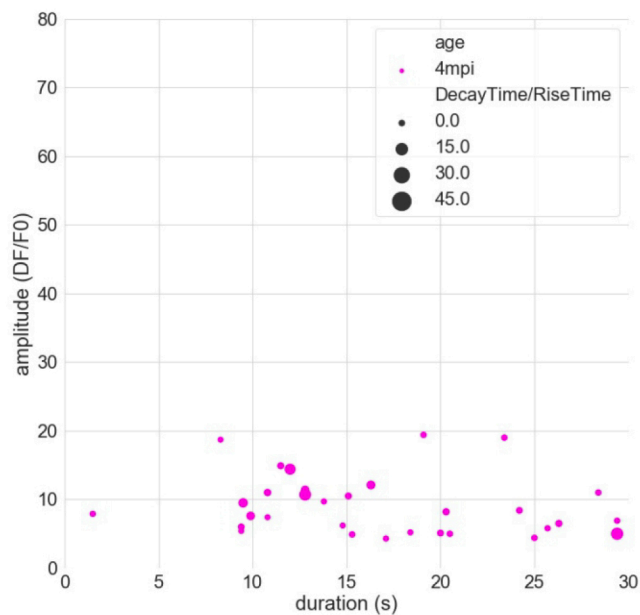**C**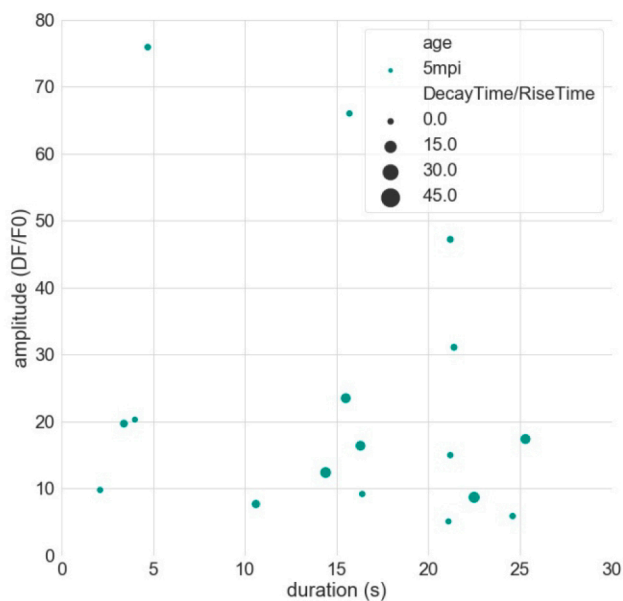**D**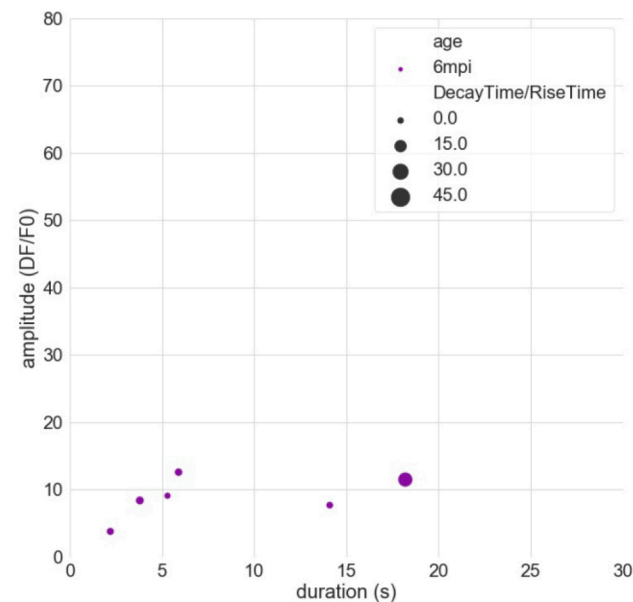

### Supplementary Figure 3

Raster plot representation of the evolution of calcium transient parameters for the neurite ROIs at each time point. Each point represents one calcium transient, the position on the x-axis represents the duration of the transient, the position on the y-axis represents the amplitude of the transient, the size of the spots represents the Decay time/Rise time ratio.
